# Supplementary material for: A discrete dimer of coordination clusters connected through additional bridging ligands
Source: Royal Society of Chemistry journal article supplement (doi:10.1039/b409502b), 2004-01-01
Supplement: b409502b.pdf [file b409502b.pdf]

Supplementary data for Zhang et al., 'A discrete dimer of coordination clusters'

Crystal data for  $C_{119}H_{88}N_9P_9Ag_4Sb_4F_{24} \cdot 3(NO_2CH_3) \cdot (CH_3CH_2)_2O \cdot H_2O$ : -  $M = 3550.46$ , triclinic, space group  $P-1$ ,  $a = 15.042(11)$ ,  $b = 18.360(18)$  Å,  $c = 27.532(18)$  Å,  $\alpha = 91.76(7)^\circ$ ,  $\beta = 94.76(6)^\circ$ ,  $\gamma = 102.59(7)^\circ$ ,  $U = 7384(10)$  Å<sup>3</sup>,  $Z = 2$ ,  $D_c = 1.597$  Mg m<sup>-3</sup>,  $F(000) = 3492$ ,  $\mu = 1.420$  mm<sup>-1</sup>, crystal dimensions = 0.54 x 0.38 x 0.30 mm. A total of 80128 reflections were measured for  $1.5 < 2\theta < 53$  and 29698 unique reflections were used in the refinement, the final parameters were  $wR2 = 0.2560$  and  $R1 = 0.0829$  [ $I > 2\sigma(I)$ ].
